# Supplementary material for: Staphylococcal Communities on Skin Are Associated with Atopic Dermatitis and Disease Severity
Source: MDPI journal article supplement (doi:10.3390/microorganisms9020432), 2021-02-19
Supplement: s1 [file s1]

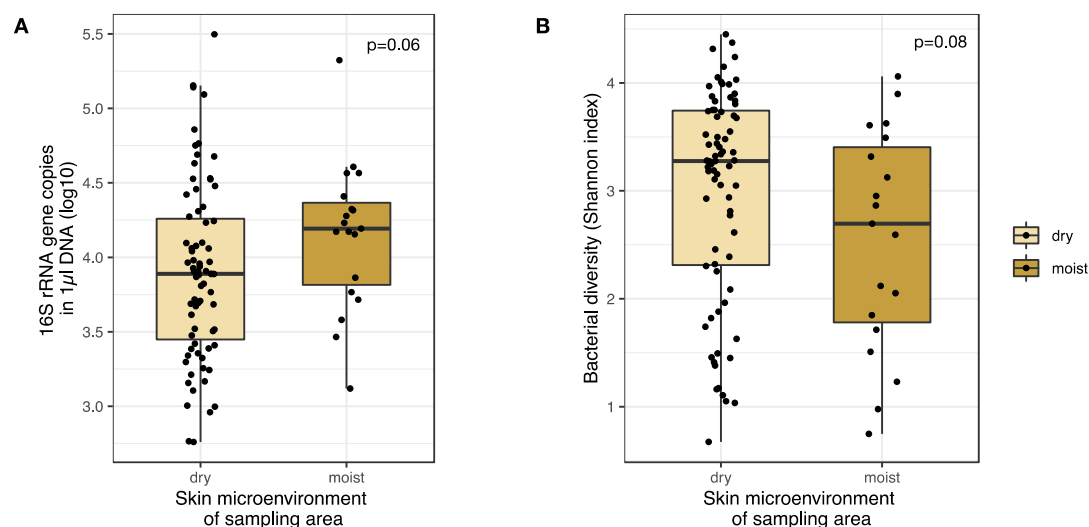

**Figure S11. Comparison of bacterial diversity and density on non-lesional AD skin collected at dry (n=75) and moist (n=19) skin areas.** **A)** Absolute abundance of bacteria was estimated using 16SrRNA qPCR and the y-axis represent log10 transformed counts of 16S rRNA gene copies within 1  $\mu$ l of DNA eluate. **B)** bacterial alpha diversity measured using the Shannon index. Boxplots represent the median and interquartile-range (IQR) with whiskers extending to the minimum/maximum value, but no longer than 1.5xIQR. Differences between groups were tested using a Mann-Whitney U test.
