# Supplementary material for: Staphylococcal Communities on Skin Are Associated with Atopic Dermatitis and Disease Severity
Source: MDPI journal article supplement (doi:10.3390/microorganisms9020432), 2021-02-19
Supplement: s1 [file s1]

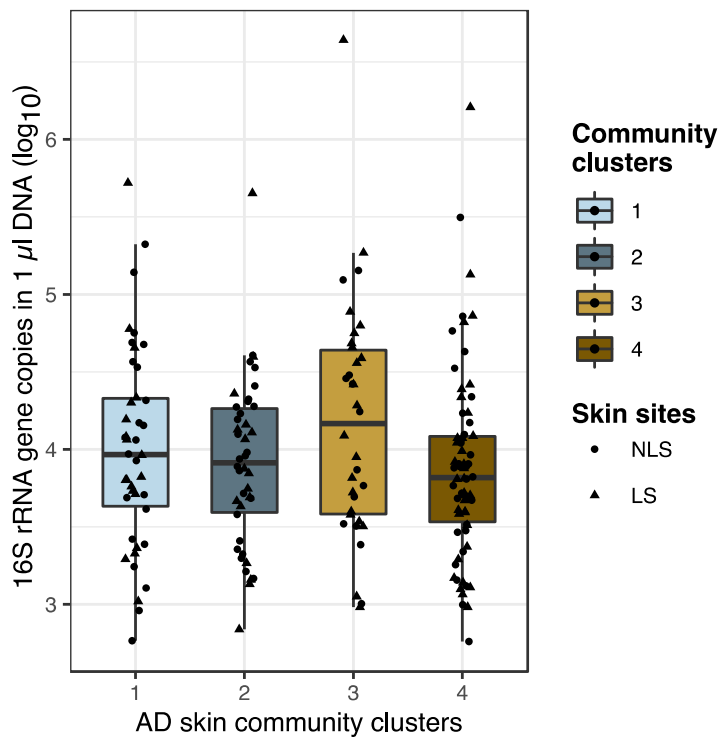

**Figure S5. Bacterial absolute abundances on skin in relation to staphylococcal community cluster assignment.** The absolute abundance of bacteria was estimated using 16SrRNA qPCR and the y-axis thus represent log<sub>10</sub> transformed counts of 16S rRNA gene copies within 1 µl of DNA eluate. The x-axis represent the four identified staphylococcal community clusters. Lesional and non-lesional skin samples are visualized as triangles and dots respectively, and boxplots represent the median and interquartile-range (IQR) with whiskers extending to the minimum/maximum value, but no longer than 1.5xIQR. Abbreviations: AD: atopic dermatitis; LS: lesional skin; NLS: non-lesional skin.
