# Supplementary material for: Staphylococcal Communities on Skin Are Associated with Atopic Dermatitis and Disease Severity
Source: MDPI journal article supplement (doi:10.3390/microorganisms9020432), 2021-02-19
Supplement: s1 [file s1]

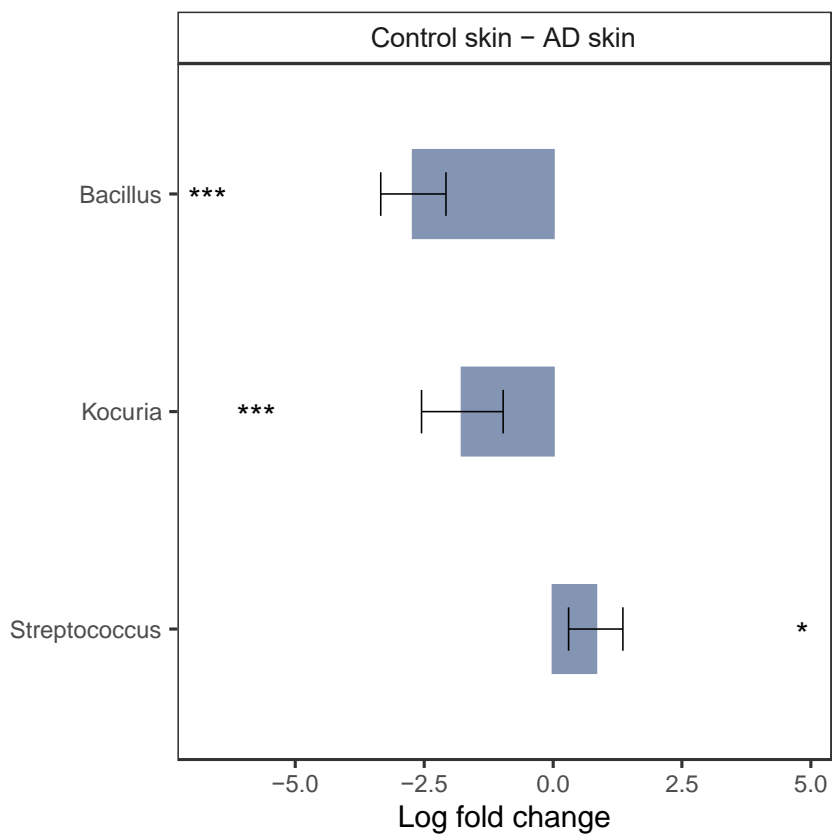

**Figure S2. Differential abundance analysis of bacteria; comparison between AD skin and healthy skin.**

Among the 30 most abundant genera on the skin of the antecubital crease, three showed differences between AD skin (n=36) and healthy control skin (n=92). Bars represent the estimated log fold change in taxa abundance between compared groups (effect size) and error bars the 95% confidence interval, which were estimated with an ANCOM-BC model, which uses the natural logarithm. Species with a fdr adjusted p-value < 0.05 are shown in the plot. \* adj. p<0.05, \*\* adj. p<0.01, \*\*\* adj. p<0.001. Abbreviations; AD: atopic dermatitis, fdr: false discovery rate.
