# Supplementary material for: Staphylococcal Communities on Skin Are Associated with Atopic Dermatitis and Disease Severity
Source: MDPI journal article supplement (doi:10.3390/microorganisms9020432), 2021-02-19
Supplement: s1 [file s1]

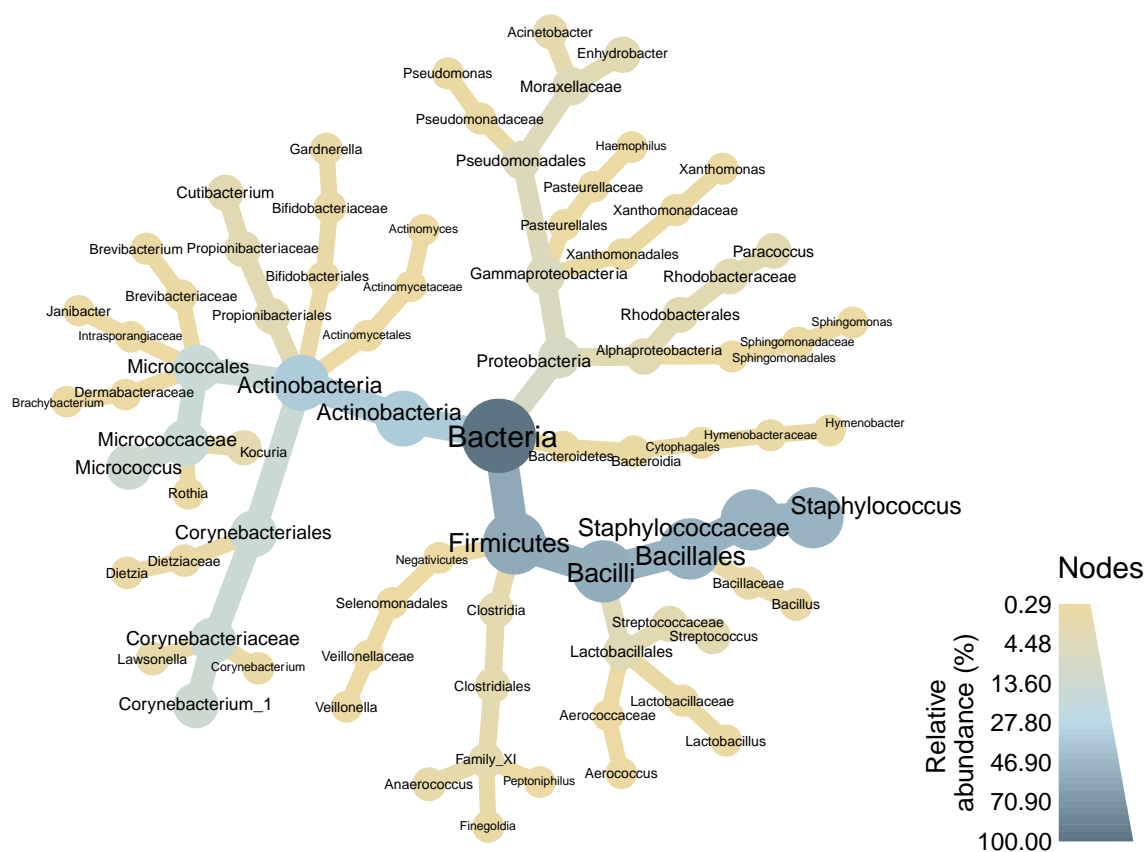

**Figure S1. Taxonomic illustration of the 30 most abundant genera on healthy skin.** Color and size of nodes and leaves correspond to the average relative abundance of taxa on healthy skin (n=92).
