# Supplementary material for: Staphylococcal Communities on Skin Are Associated with Atopic Dermatitis and Disease Severity
Source: MDPI journal article supplement (doi:10.3390/microorganisms9020432), 2021-02-19
Supplement: s1 [file s1]

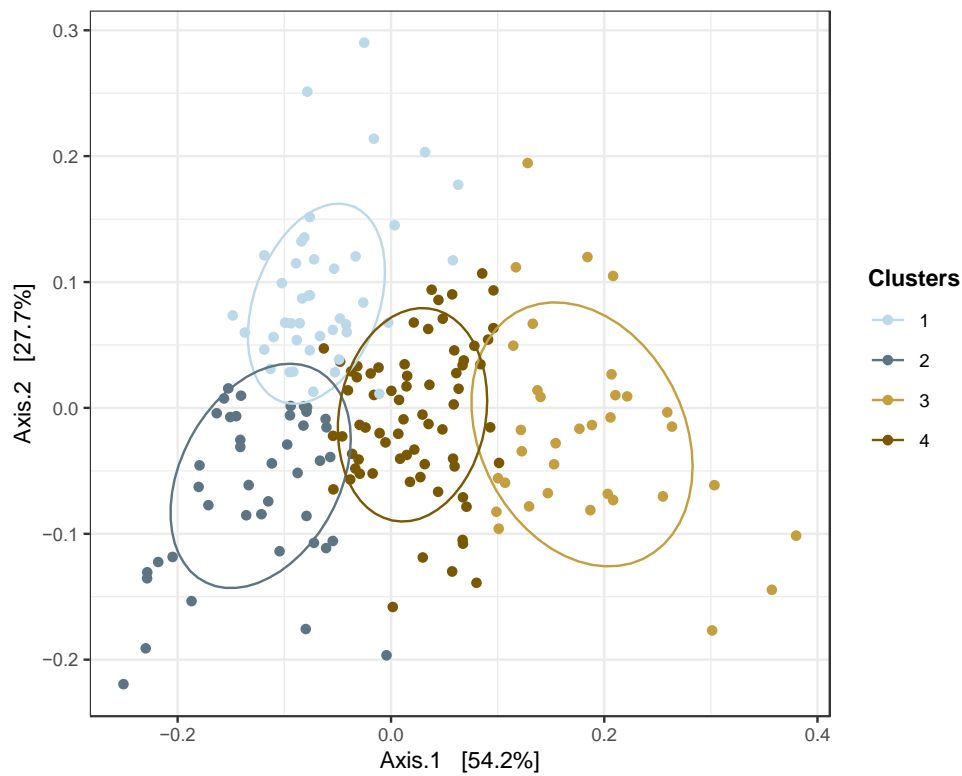

**Figure S3. Comparison of species composition within defined staphylococcal community clusters on AD skin.** Lesional and non-lesional skin samples of 94 AD patients were grouped into four distinct community clusters based on the compositional similarities of the staphylococcal species. PCoA plot is based on Jensen-Shannon divergence.
