# Supplementary material for: Staphylococcal Communities on Skin Are Associated with Atopic Dermatitis and Disease Severity
Source: MDPI journal article supplement (doi:10.3390/microorganisms9020432), 2021-02-19
Supplement: s1 [file s1]

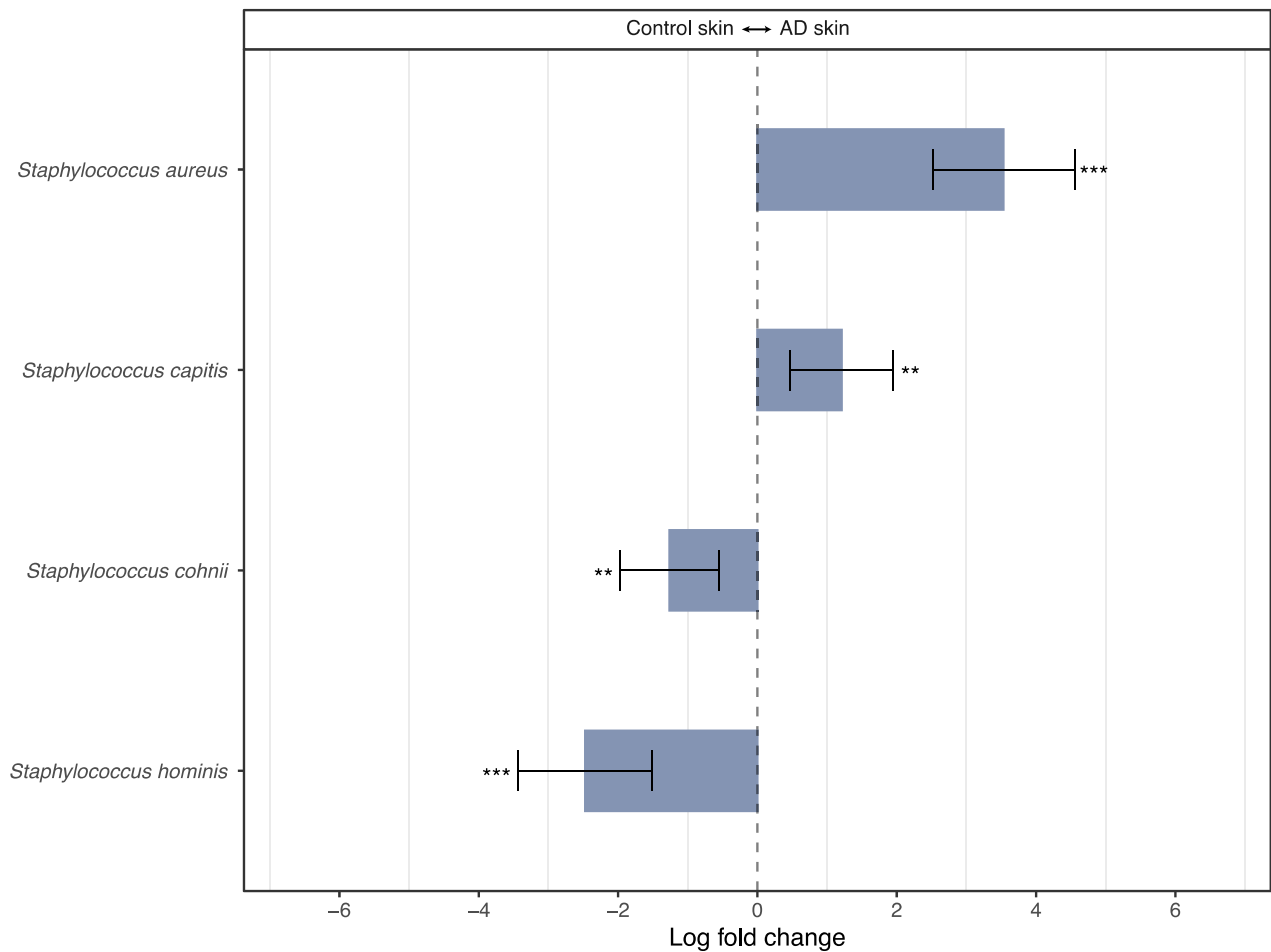

**Figure S10. Differential abundance analysis of staphylococcal species; comparisons between AD skin and healthy skin.** *tuf* amplicon sequence based differential abundance analysis indicated that the abundance of four staphylococcal species on the skin of the antecubital crease differed between AD skin (n=36) and healthy control skin (n=92). **A)** The ANCOM-BC model outcome. Bars represent the estimated log fold change (natural logarithm) in species abundance between compared groups (effect size) and error bars the 95% confidence interval. Species with a fdr-adjusted p-value < 0.05 are shown in the plot. \*\* adj. p<0.01, \*\*\* adj. p<0.001. Abbreviations: AD: atopic dermatitis; fdr: false discovery rate.
