# Supplementary material for: Staphylococcal Communities on Skin Are Associated with Atopic Dermatitis and Disease Severity
Source: MDPI journal article supplement (doi:10.3390/microorganisms9020432), 2021-02-19
Supplement: s1 [file s1]

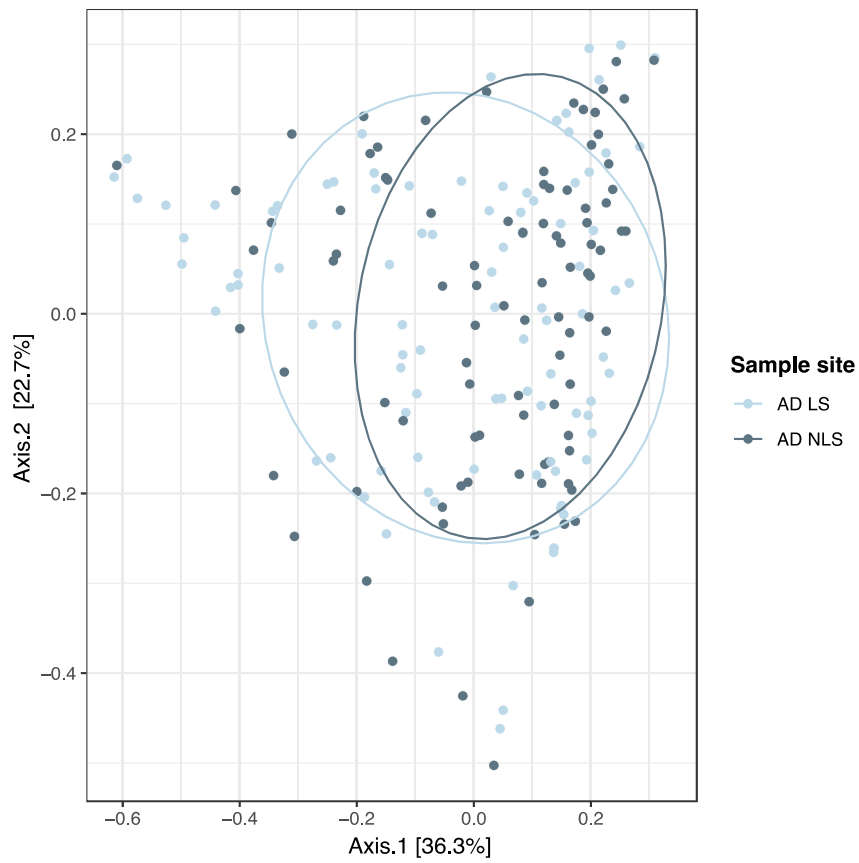

**Figure S6. Comparison of Staphylococcal species composition within lesional and non-lesional AD skin.** PCoA plot based on Bray-Curtis dissimilarity matrix. Abbreviations: AD: atopic dermatitis, LS: lesional skin, NLS: non-lesional skin.
