# Supplementary material for: Staphylococcal Communities on Skin Are Associated with Atopic Dermatitis and Disease Severity
Source: MDPI journal article supplement (doi:10.3390/microorganisms9020432), 2021-02-19
Supplement: s1 [file s1]

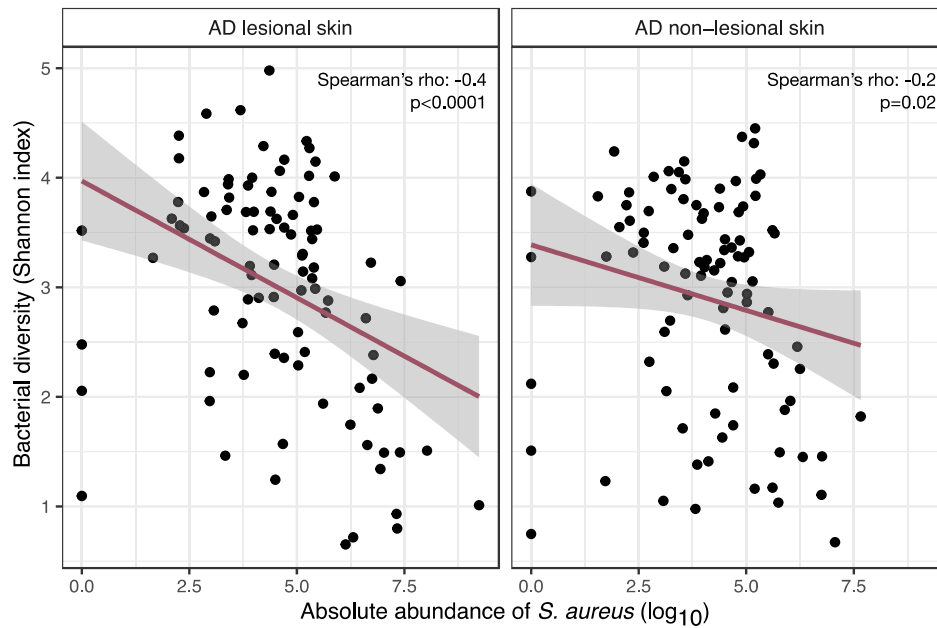

**Figure S4. Correlations between absolute abundance of *Staphylococcus aureus* and bacterial alpha diversity.** Scatter plots comparing bacterial alpha diversity, measured by Shannon index, and the absolute abundance of *S. aureus* within AD lesional and non-lesional skin. The absolute abundance of *S. aureus* was calculated by combining the proportional abundance within the bacterial community with 16S rRNA qPCR data. Correlations were tested using a Spearman's correlation test. Abbreviations. AD: atopic dermatitis.
