# Supplementary material for: Staphylococcal Communities on Skin Are Associated with Atopic Dermatitis and Disease Severity
Source: MDPI journal article supplement (doi:10.3390/microorganisms9020432), 2021-02-19
Supplement: s1 [file s1]

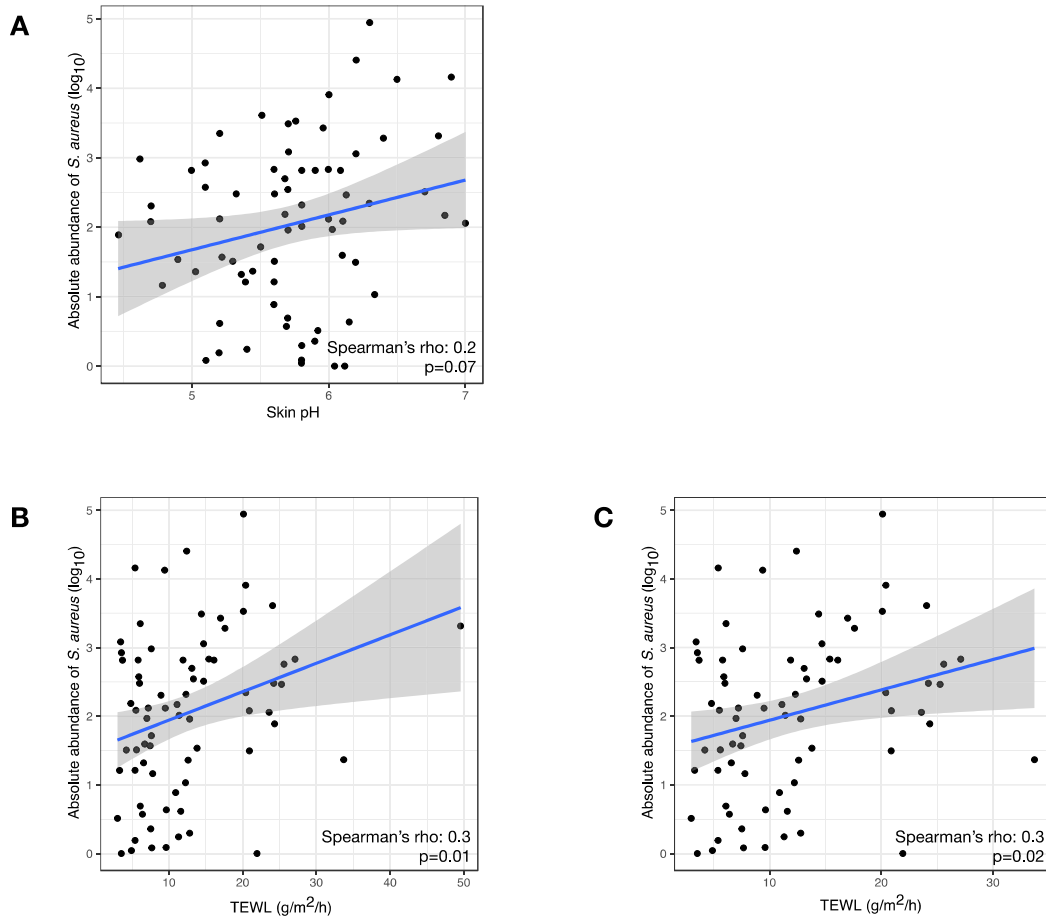

**Figure S9. Correlations between the absolute abundance of *S. aureus* with pH and TEWL.** A) Scatter plot comparing pH of non-lesional skin and the absolute abundance of *S. aureus*, which was estimated by combining the proportional abundance of *S. aureus* within the bacterial community with 16S rRNA qPCR data. B) Scatter plot comparing TEWL of non-lesional skin and the absolute abundance of *S. aureus* C) Same as in B, but with removal of one high TEWL outlier, in order to test the importance of this single measure on the final test result. Correlations between variables were tested using a Spearman's correlation test. Abbreviations: TEWL: Transepidermal water loss.
