# Supplementary material for: Staphylococcal Communities on Skin Are Associated with Atopic Dermatitis and Disease Severity
Source: MDPI journal article supplement (doi:10.3390/microorganisms9020432), 2021-02-19
Supplement: s1 [file s1]

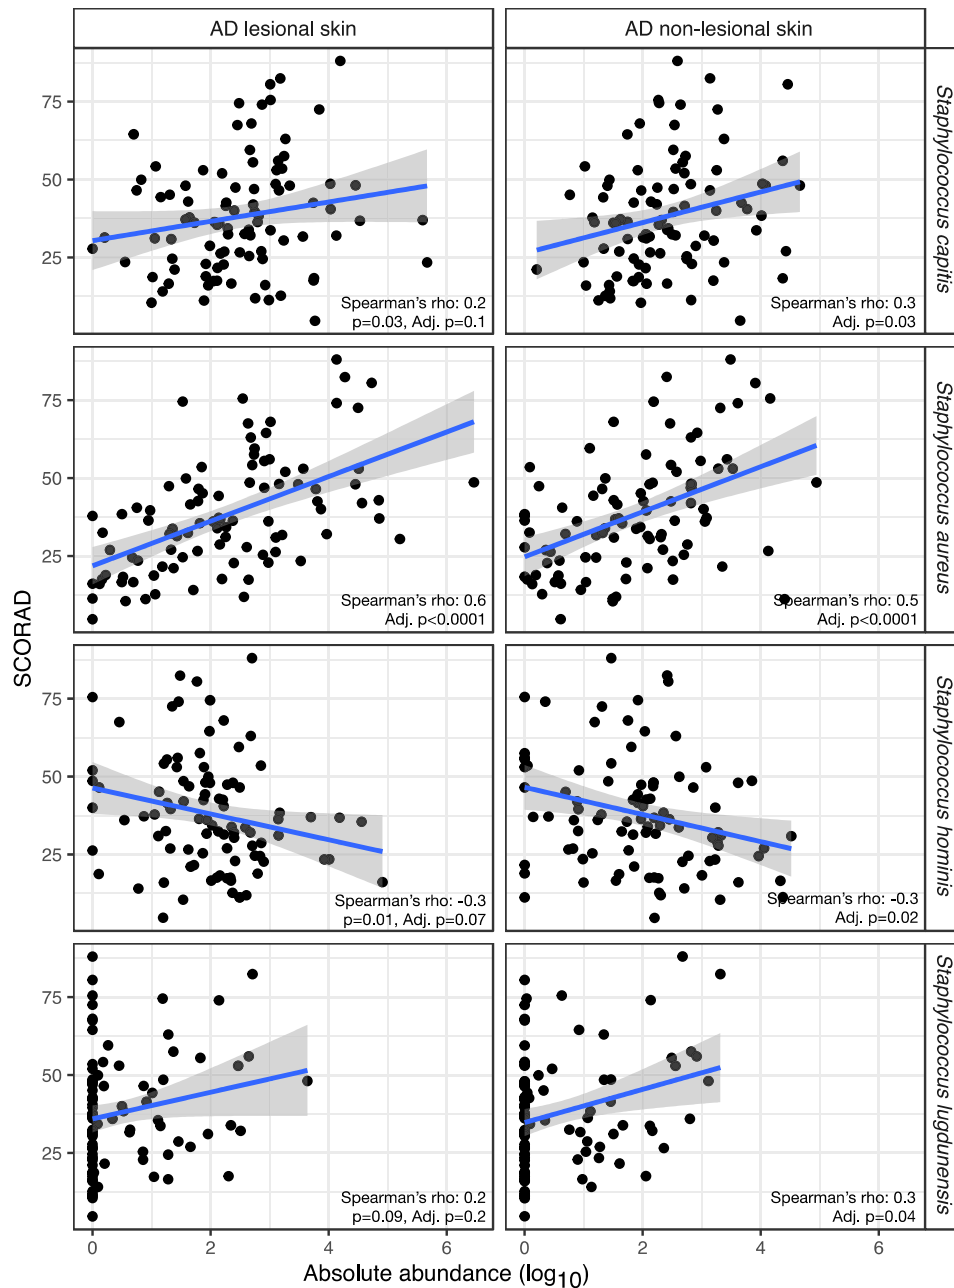

**Figure S8. Correlations between SCORAD and absolute abundances of staphylococcal species.** Scatter plots comparing SCORAD the absolute abundance of four staphylococcal species: *S. capitis*, *S. aureus*, *S. hominis*, and *S. lugdunensis*. The absolute species abundance was estimated by combining the proportional abundance of a species within the bacterial community with 16S rRNA qPCR data. Correlations between variables were tested using a Spearman's correlation test. Abbreviations. AD: atopic dermatitis, SCORAD: SCORing Atopic Dermatitis.
